# Supplementary material
Source: HighWire-hosted journal article supplement (https://rmdopen.bmj.com/content/5/2/e001049)
Supplement: inline-supplementary-material-1 [file inline-supplementary-material-1.pdf]

Ilar et al. 2019  
Occupational exposure to organic dusts and risk of developing RA

## Supplementary tables

**Supplementary Table 1.** Table of characteristics (n=142,276).

|                             | Men                |                        | Women              |                        |
|-----------------------------|--------------------|------------------------|--------------------|------------------------|
|                             | Cases<br>(n=3,929) | Controls<br>(n=40,300) | Cases<br>(n=8,675) | Controls<br>(n=89,372) |
| Age (median)                | 61                 | 61                     | 57                 | 57                     |
| Exposed to wood dust (%)    | 396 (10)           | 3474 (9)               | 78 (1)             | 643 (1)                |
| Exposed to animal dust (%)  | 209 (5)            | 1676 (4)               | 208 (2)            | 1697 (2)               |
| Exposed to paper dust (%)   | 241 (6)            | 2571 (6)               | 377 (4)            | 3485 (4)               |
| Exposed to textile dust (%) | 60 (2)             | 471 (1)                | 317 (4)            | 2769 (3)               |
| Exposed to flour dust (%)   | 46 (1)             | 366 (1)                | 32 (0)             | 369 (0)                |
| Education (%)               |                    |                        |                    |                        |
| 9 years or less             | 1,415 (36)         | 12,437 (31)            | 2,165 (25)         | 20,360 (23)            |
| 10-12 years                 | 1,736 (44)         | 17,492 (43)            | 3,994 (46)         | 39,562 (44)            |
| >12 years                   | 778 (20)           | 10,371 (26)            | 2,516 (29)         | 29,450 (33)            |
| Smoking                     |                    |                        |                    |                        |
| Ever smoking (%)            | 2,737 (70)         | 25,007 (62)            | 5,359 (62)         | 46,303 (52)            |
| Pack-years (median)         | 20                 | 17                     | 15                 | 11                     |
| Alcohol consumption         |                    |                        |                    |                        |
| Non-drinkers (%)            | 278 (7)            | 2,674 (7)              | 748 (9)            | 7,080 (8)              |
| Low consumption (%)         | 1,401 (36)         | 11,455 (28)            | 5,085 (59)         | 47,693 (53)            |
| Moderate consumption (%)    | 1,020 (26)         | 10,852 (27)            | 1,740 (20)         | 19,912 (22)            |
| High consumption (%)        | 1,230 (31)         | 15,319 (38)            | 1,101 (13)         | 14,686 (16)            |

**Supplementary Table 2.** Risk of developing RA among workers ever exposed to different types of organic dusts compared to never exposed workers (n=142,276).

|                       | All RA cases                |                              |               |               | Seropositive RA cases |               | Seronegative RA cases |               |
|-----------------------|-----------------------------|------------------------------|---------------|---------------|-----------------------|---------------|-----------------------|---------------|
|                       | Ever exposed cases/controls | Never exposed cases/controls | OR (95 % CI)* | OR (95 % CI)† | OR (95 % CI)*         | OR (95 % CI)† | OR (95 % CI)*         | OR (95 % CI)† |
| <b>Men</b>            |                             |                              |               |               |                       |               |                       |               |
| Wood dust             | 396/3474                    | 3487/36333                   | 1.2 (1.1-1.3) | 1.0 (0.8-1.1) | 1.2 (1.0-1.3)         | 0.9 (0.8-1.1) | 1.2 (1.0-1.5)         | 1.1 (0.9-1.3) |
| Animal dust           | 209/1676                    | 3638/37857                   | 1.3 (1.1-1.5) | 1.3 (1.1-1.5) | 1.3 (1.1-1.6)         | 1.4 (1.1-1.7) | 1.2 (0.9-1.5)         | 1.2 (0.9-1.5) |
| Paper dust            | 241/2571                    | 3484/35841                   | 1.0 (0.8-1.1) | 1.0 (0.8-1.1) | 1.0 (0.9-1.2)         | 1.0 (0.8-1.2) | 0.9 (0.7-1.1)         | 0.9 (0.7-1.1) |
| Textile dust          | 60/471                      | 3835/39442                   | 1.3 (1.0-1.7) | 1.1 (0.8-1.5) | 1.4 (1.0-1.9)         | 1.1 (0.8-1.6) | 1.1 (0.7-1.8)         | 1.1 (0.7-1.8) |
| Flour dust            | 46/366                      | 3883/39934                   | 1.3 (0.9-1.8) | 1.2 (0.9-1.6) | 1.2 (0.8-1.8)         | 1.1 (0.7-1.6) | 1.5 (0.9-2.4)         | 1.4 (0.9-2.3) |
| <b>Women</b>          |                             |                              |               |               |                       |               |                       |               |
| Wood dust             | 78/643                      | 8511/87497                   | 1.2 (1.0-1.6) | 1.2 (0.9-1.5) | 1.3 (1.0-1.7)         | 1.2 (0.9-1.6) | 1.1 (0.7-1.7)         | 1.1 (0.7-1.7) |
| Animal dust           | 208/1697                    | 8438/87260                   | 1.2 (1.1-1.4) | 1.3 (1.1-1.5) | 1.2 (1.0-1.4)         | 1.2 (1.0-1.4) | 1.4 (1.1-1.8)         | 1.4 (1.1-1.8) |
| Paper dust            | 377/3485                    | 8202/84930                   | 1.1 (1.0-1.2) | 1.0 (0.9-1.2) | 1.1 (1.0-1.3)         | 1.0 (0.9-1.2) | 1.1 (0.9-1.3)         | 1.1 (0.9-1.3) |
| Textile dust          | 317/2769                    | 8273/85371                   | 1.2 (1.0-1.3) | 1.1 (1.0-1.3) | 1.2 (1.0-1.4)         | 1.1 (1.0-1.3) | 1.1 (0.9-1.4)         | 1.1 (0.9-1.4) |
| Flour dust            | 32/369                      | 8643/89003                   | 0.9 (0.6-1.3) | 0.9 (0.6-1.4) | 0.9 (0.6-1.3)         | 0.9 (0.6-1.5) | 0.9 (0.5-1.8)         | 0.9 (0.5-1.8) |
| <b>Men and women‡</b> |                             |                              |               |               |                       |               |                       |               |
| Wood dust             | 474/4117                    | 11998/123830                 | 1.2 (1.1-1.3) | 1.0 (0.9-1.1) | 1.2 (1.1-1.3)         | 1.0 (0.9-1.1) | 1.2 (1.0-1.4)         | 1.1 (0.9-1.3) |
| Animal dust           | 417/3373                    | 12076/125117                 | 1.3 (1.1-1.4) | 1.3 (1.1-1.4) | 1.2 (1.1-1.4)         | 1.3 (1.1-1.5) | 1.3 (1.1-1.6)         | 1.3 (1.1-1.5) |
| Paper dust            | 618/6056                    | 11686/120771                 | 1.1 (1.0-1.1) | 1.0 (0.9-1.1) | 1.1 (1.0-1.2)         | 1.0 (0.9-1.1) | 1.0 (0.9-1.2)         | 1.0 (0.8-1.1) |
| Textile dust          | 377/3240                    | 12108/124813                 | 1.2 (1.1-1.3) | 1.1 (1.0-1.3) | 1.2 (1.1-1.4)         | 1.1 (1.0-1.3) | 1.1 (0.9-1.4)         | 1.1 (0.9-1.3) |
| Flour dust            | 78/735                      | 12526/128937                 | 1.1 (0.9-1.4) | 1.0 (0.8-1.3) | 1.0 (0.8-1.4)         | 1.0 (0.7-1.3) | 1.2 (0.8-1.8)         | 1.2 (0.8-1.8) |

\* Adjusted for county, age and index year.

† Additionally adjusted for pack-years of smoking, alcohol consumption and silica dust.

‡ Additionally adjusted for sex.

CI, confidence interval; OR, odds ratio; RA, rheumatoid arthritis.

Ilar et al. 2019  
Occupational exposure to organic dusts and risk of developing RA

**Supplementary Table 3.** Risk of developing rheumatoid arthritis (RA) among workers exposed to organic dust in different number of censuses compared to never exposed workers (n=142,276).

|                     | All RA cases   |                                             |                                                          | Seropositive RA | Seronegative RA |
|---------------------|----------------|---------------------------------------------|----------------------------------------------------------|-----------------|-----------------|
|                     | cases/controls | Mean average intensity (mg/m <sup>3</sup> ) | Median years since last occupation classified as exposed | OR (95 % CI)*   | OR (95 % CI)*   |
| <b>Wood dust</b>    |                |                                             |                                                          |                 |                 |
| Unexposed           | 11998/123830   | 0.00                                        | .                                                        | 1.0             | 1.0             |
| 1-2 censuses        | 304/2885       | 0.84                                        | 23                                                       | 1.0 (0.8-1.1)   | 0.9 (0.8-1.1)   |
| 3-4 censuses        | 137/950        | 0.73                                        | 16                                                       | 1.2 (1.0-1.4)   | 1.1 (0.9-1.4)   |
| 5-7 censuses        | 33/282         | 0.76                                        | 8                                                        | 1.0 (0.7-1.5)   | 1.2 (0.7-1.8)   |
| P for trend         |                |                                             |                                                          | 0.5014          | 0.6855          |
| <b>Animal dust</b>  |                |                                             |                                                          |                 |                 |
| Unexposed           | 12076/125117   | 0.00                                        | .                                                        | 1.0             | 1.0             |
| 1-2 censuses        | 247/2055       | 0.04                                        | 23                                                       | 1.2 (1.0-1.4)   | 1.1 (0.9-1.4)   |
| 3-4 censuses        | 113/913        | 0.03                                        | 18                                                       | 1.4 (1.1-1.7)   | 1.3 (1.0-1.7)   |
| 5-7 censuses        | 57/405         | 0.03                                        | 12                                                       | 1.7 (1.2-2.4)   | 1.9 (1.3-2.9)   |
| P for trend         |                |                                             |                                                          | 0.0001          | 0.0001          |
| <b>Paper dust</b>   |                |                                             |                                                          |                 |                 |
| Unexposed           | 11686/120771   | 0.00                                        | .                                                        | 1.0             | 1.0             |
| 1-2 censuses        | 502/4941       | 0.10                                        | 21                                                       | 1.0 (0.9-1.1)   | 1.0 (0.9-1.1)   |
| 3-4 censuses        | 96/893         | 0.12                                        | 15                                                       | 1.1 (0.9-1.4)   | 1.1 (0.9-1.5)   |
| 5-7 censuses        | 20/222         | 0.09                                        | 8                                                        | 1.0 (0.6-1.6)   | 1.0 (0.6-1.9)   |
| P for trend         |                |                                             |                                                          | 0.6599          | 0.4420          |
| <b>Textile dust</b> |                |                                             |                                                          |                 |                 |
| Unexposed           | 12108/124813   | 0.00                                        | .                                                        | 1.0             | 1.0             |
| 1-2 censuses        | 314/2746       | 0.14                                        | 32                                                       | 1.1 (1.0-1.2)   | 1.1 (0.9-1.3)   |

Ilar et al. 2019

Occupational exposure to organic dusts and risk of developing RA

|                   |              |      |    |               |               |               |
|-------------------|--------------|------|----|---------------|---------------|---------------|
| 3-4 censuses      | 55/428       | 0.13 | 21 | 1.4 (1.0-1.9) | 1.5 (1.0-2.1) | 1.3 (0.8-2.1) |
| 5-7 censuses      | 8/66         | 0.13 | 15 | 1.1 (0.5-2.7) | 1.2 (0.4-3.6) | -             |
| P for trend       |              |      |    | 0.0175        | 0.0181        | 0.4889        |
| <b>Flour dust</b> |              |      |    |               |               |               |
| Unexposed         | 12526/128937 | 0.00 | .  | 1.0           | 1.0           | 1.0           |
| 1-2 censuses      | 62/618       | 1.13 | 26 | 1.0 (0.7-1.3) | 0.9 (0.6-1.3) | 1.1 (0.7-1.8) |
| 3-4 censuses      | 12/82        | 1.21 | 18 | 1.5 (0.8-2.9) | 1.6 (0.7-3.6) | -             |
| 5-7 censuses      | 4/35         | 1.21 | 14 | -             | -             | -             |
| P for trend       |              |      |    | 0.2387        | 0.6212        | -             |

\* Adjusted for county, age, sex, index year, pack-years of smoking, alcohol consumption and silica dust.

CI, confidence interval; OR, odds ratio; RA, rheumatoid arthritis.

Ilar et al. 2019  
Occupational exposure to organic dusts and risk of developing RA

**Supplementary Table 4.** Risk of developing RA among workers exposed to organic dust from highest average intensity compared to never exposed workers (n=142 276).

| Percentiles         | All RA cases   |                                             |                                                          |               | Seropositive RA | Seronegative RA |
|---------------------|----------------|---------------------------------------------|----------------------------------------------------------|---------------|-----------------|-----------------|
|                     | cases/controls | Mean highest intensity (mg/m <sup>3</sup> ) | Median years since last occupation classified as exposed | OR (95 % CI)* | OR (95 % CI)*   | OR (95 % CI)*   |
| <b>Wood dust</b>    |                |                                             |                                                          |               |                 |                 |
| Unexposed           | 11993/123777   | 0.00                                        | .                                                        | 1.0           | 1.0             | 1.0             |
| ≤50                 | 275/2079       | 0.44                                        | 25                                                       | 1.1 (1.0-1.3) | 1.0 (0.9-1.2)   | 1.3 (1.0-1.6)   |
| >50-≤75             | 121/1195       | 1.24                                        | 11                                                       | 1.0 (0.8-1.2) | 1.0 (0.8-1.2)   | 1.0 (0.7-1.3)   |
| > 75                | 83/896         | 1.78                                        | 21                                                       | 0.9 (0.7-1.1) | 0.9 (0.7-1.2)   | 0.8 (0.6-1.2)   |
| P for trend         |                |                                             |                                                          | 0.5281        | 0.5482          | 0.7564          |
| <b>Animal dust</b>  |                |                                             |                                                          |               |                 |                 |
| Unexposed           | 12072/125059   | 0.00                                        | .                                                        | 1.0           | 1.0             | 1.0             |
| ≤50                 | 175/1456       | 0.01                                        | 22                                                       | 1.2 (1.0-1.4) | 1.1 (0.9-1.4)   | 1.3 (1.0-1.7)   |
| >50-≤75             | 137/1133       | 0.02                                        | 24                                                       | 1.3 (1.1-1.5) | 1.2 (1.0-1.6)   | 1.4 (1.0-1.8)   |
| > 75                | 109/842        | 0.19                                        | 13                                                       | 1.4 (1.1-1.7) | 1.5 (1.2-1.9)   | 1.1 (0.8-1.6)   |
| P for trend         |                |                                             |                                                          | 0.0463        | 0.0326          | 0.7034          |
| <b>Paper dust</b>   |                |                                             |                                                          |               |                 |                 |
| Unexposed           | 11672/120666   | 0.00                                        | .                                                        | 1.0           | 1.0             | 1.0             |
| ≤50                 | 311/3182       | 0.05                                        | 20                                                       | 1.0 (0.8-1.1) | 0.9 (0.8-1.1)   | 1.0 (0.8-1.2)   |
| >50-≤75             | 153/1502       | 0.09                                        | 15                                                       | 1.1 (0.9-1.3) | 1.0 (0.8-1.2)   | 1.2 (0.9-1.6)   |
| > 75                | 168/1477       | 0.28                                        | 23                                                       | 1.1 (0.9-1.3) | 1.2 (1.0-1.5)   | 0.9 (0.6-1.2)   |
| P for trend         |                |                                             |                                                          | 0.7371        | 0.5335          | 0.6644          |
| <b>Textile dust</b> |                |                                             |                                                          |               |                 |                 |
| Unexposed           | 12103/124781   | 0.00                                        | .                                                        | 1.0           | 1.0             | 1.0             |
| ≤50                 | 273/2286       | 0.11                                        | 30                                                       | 1.2 (1.0-1.3) | 1.1 (1.0-1.3)   | 1.2 (0.9-1.5)   |

Ilar et al. 2019

Occupational exposure to organic dusts and risk of developing RA

|                   |              |      |    |               |               |               |
|-------------------|--------------|------|----|---------------|---------------|---------------|
| >50-≤75           | 22/241       | 0.20 | 39 | 0.9 (0.5-1.3) | 0.9 (0.5-1.5) | 0.8 (0.3-1.7) |
| > 75              | 87/745       | 0.25 | 30 | 1.1 (0.9-1.5) | 1.2 (0.9-1.6) | 1.1 (0.7-1.6) |
| P for trend       |              |      |    | 0.1378        | 0.1186        | 0.7309        |
| <b>Flour dust</b> |              |      |    |               |               |               |
| Unexposed         | 12525/128922 | 0.00 | .  | 1.0           | 1.0           | 1.0           |
| ≤50               | 79/750       | 1.17 | 24 | 1.0 (0.8-1.3) | 1.0 (0.7-1.3) | 1.2 (0.8-1.7) |
| >50-≤75           | 0/0          | -    | -  | -             | -             | -             |
| > 75              | 0/0          | -    | -  | -             | -             | -             |
| P for trend       |              |      |    | -             | -             | -             |

\* Adjusted for county, age, sex, index year, pack-years of smoking, alcohol consumption and silica dust.

CI, confidence interval; OR, odds ratio; RA, rheumatoid arthritis.

Ilar et al. 2019  
Occupational exposure to organic dusts and risk of developing RA

**Supplementary Table 5.** The two most common occupations (with at least 50 % probability of exposure) per exposure and census (n=142,276).

|                    |                                                                           | Men  |    | Women                                                                     |        |
|--------------------|---------------------------------------------------------------------------|------|----|---------------------------------------------------------------------------|--------|
|                    |                                                                           | Freq | %  | Freq                                                                      | %      |
| <b>Wood dust</b>   |                                                                           |      |    |                                                                           |        |
| <b>1960</b>        | Bench carpenters and cabinet makers                                       | 271  | 35 | Wood work n.e.c                                                           | 11 42  |
|                    | Construction carpenters and joiners                                       | 242  | 32 | Bench carpenters and cabinet makers                                       | 8 31   |
| <b>1970</b>        | Construction carpenters and joiners                                       | 776  | 52 | Bench carpenters and cabinet makers                                       | 44 51  |
|                    | Bench carpenters and cabinet makers                                       | 390  | 26 | Wood work n e c                                                           | 17 20  |
| <b>1975</b>        | Construction carpenters and joiners                                       | 858  | 51 | Bench carpenters and cabinet makers                                       | 84 54  |
|                    | Bench carpenters and cabinet makers                                       | 447  | 27 | Wood work n e c                                                           | 31 20  |
| <b>1980</b>        | Construction carpenters and joiners                                       | 958  | 55 | Bench carpenters and cabinet makers                                       | 146 64 |
|                    | Bench carpenters and cabinet makers                                       | 485  | 28 | Frame and circular sawyers and planers                                    | 23 10  |
| <b>1990</b>        | Construction carpenters                                                   | 849  | 58 | Wood workers n.e.c.                                                       | 70 26  |
|                    | Woodworking machine operators                                             | 182  | 12 | Woodworking machine operators                                             | 57 21  |
| <b>2001</b>        | Woodworking machine operators                                             | 337  | 55 | Woodworking machine operators                                             | 167 94 |
|                    | Cabinet makers and joiners                                                | 219  | 36 | Cabinet makers and joiners                                                | 6 3    |
| <b>2010</b>        | Cabinet makers and joiners                                                | 405  | 64 | Woodworking machine operators                                             | 49 51  |
|                    | Woodworking machine operators                                             | 129  | 20 | Cabinet makers and joiners                                                | 22 23  |
| <b>Animal dust</b> |                                                                           |      |    |                                                                           |        |
| <b>1960</b>        | Working proprietors, agricultural, horticultural and forestry enterprises | 253  | 84 | Livestock workers                                                         | 34 59  |
|                    | Livestock workers                                                         | 30   | 10 | Working proprietors, agricultural, horticultural and forestry enterprises | 18 31  |
| <b>1970</b>        | Working proprietors, agricultural, horticultural and forestry enterprises | 502  | 88 | Livestock workers                                                         | 94 60  |
|                    | Livestock workers                                                         | 43   | 8  | Working proprietors, agricultural, horticultural and forestry enterprises | 36 23  |
| <b>1975</b>        | Working proprietors, agricultural, horticultural and forestry enterprises | 665  | 65 | Agricultural workers                                                      | 549 66 |
|                    | Agricultural workers                                                      | 320  | 31 | Working proprietors, agricultural, horticultural and forestry enterprises | 226 27 |
| <b>1980</b>        | Working proprietors, agricultural, horticultural and forestry enterprises | 945  | 79 | Working proprietors, agricultural, horticultural and forestry enterprises | 895 76 |
|                    | Agricultural and livestock workers                                        | 207  | 17 | Agricultural and livestock workers                                        | 207 17 |
| <b>1990</b>        | Working proprietors in agriculture and forestry                           | 803  | 93 | Working proprietors in agriculture and forestry                           | 602 82 |
|                    | Livestock, dairy and poultry farm workers                                 | 32   | 4  | Livestock, dairy and poultry farm workers                                 | 90 12  |
| <b>2001</b>        | Livestock, dairy and poultry farm workers                                 | 241  | 70 | Livestock, dairy and poultry farm workers                                 | 68 57  |

|                     |                                                 |     |    | Hjar et al. 2019                                                 |        |
|---------------------|-------------------------------------------------|-----|----|------------------------------------------------------------------|--------|
|                     |                                                 |     |    | Occupational exposure to organic dusts and risk of developing RA |        |
|                     | Working proprietors in agriculture and forestry | 85  | 25 | Working proprietors in agriculture and forestry                  | 23 19  |
| <b>2010</b>         | Livestock, dairy and poultry farm workers       | 196 | 75 | Livestock, dairy and poultry farm workers                        | 112 67 |
|                     | Working proprietors in agriculture and forestry | 52  | 20 | Veterinarians                                                    | 27 16  |
| <b>Paper dust</b>   |                                                 |     |    |                                                                  |        |
| <b>1960</b>         | Typographers, lithographers                     | 276 | 46 | Packers                                                          | 141 43 |
|                     | Sorting clerks and postmen                      | 149 | 25 | Bookbinders                                                      | 89 27  |
| <b>1970</b>         | Typographers, lithographers                     | 335 | 45 | Typographers, lithographers                                      | 269 43 |
|                     | Sorting clerks and postmen                      | 195 | 26 | Bookbinders                                                      | 100 16 |
| <b>1975</b>         | Typographers, lithographers                     | 367 | 40 | Packers                                                          | 390 44 |
|                     | Sorting clerks and postmen                      | 259 | 28 | Sorting clerks and postmen                                       | 179 20 |
| <b>1980</b>         | Typographers, lithographers                     | 349 | 37 | Packers                                                          | 324 34 |
|                     | Sorting clerks and postmen                      | 277 | 29 | Sorting clerks and postmen                                       | 251 26 |
| <b>1990</b>         | Mail sorting clerks and postmen                 | 299 | 35 | Packers                                                          | 457 38 |
|                     | Printing pressmen                               | 209 | 24 | Mail sorting clerks and postmen                                  | 441 37 |
| <b>2001</b>         | Packers                                         | 459 | 59 | Packers                                                          | 718 67 |
|                     | Mail sorting clerks and postmen                 | 251 | 32 | Mail sorting clerks and postmen                                  | 338 31 |
| <b>2010</b>         | Packers                                         | 143 | 35 | Packers                                                          | 222 43 |
|                     | Mail sorting clerks and postmen                 | 142 | 34 | Mail sorting clerks and postmen                                  | 197 38 |
| <b>Textile dust</b> |                                                 |     |    |                                                                  |        |
| <b>1960</b>         | Spinners, weavers, knitters and dyers           | 51  | 32 | Seamstresses, ready-made clothing                                | 555 56 |
|                     | Upholsterers                                    | 47  | 29 | Spinners, weavers, knitters and dyers                            | 177 18 |
| <b>1970</b>         | Upholsterers                                    | 67  | 35 | Seamstresses, ready-made clothing                                | 459 49 |
|                     | Spinners, weavers, knitters and dyers           | 55  | 29 | Spinners, weavers, knitters and dyers                            | 148 16 |
| <b>1975</b>         | Upholsterers                                    | 79  | 39 | Tailors and dressmakers                                          | 500 50 |
|                     | Spinners, weavers, knitters and dyers           | 46  | 23 | Spinners, weavers, knitters and dyers                            | 172 17 |
| <b>1980</b>         | Upholsterers                                    | 69  | 43 | Tailors and dressmakers                                          | 344 50 |
|                     | Spinners, weavers, knitters and dyers           | 38  | 23 | Spinners, weavers, knitters and dyers                            | 147 21 |
| <b>1990</b>         | Upholsterers                                    | 41  | 33 | Dressmakers and sewers                                           | 439 55 |
|                     | Lauderers and dry-cleaners                      | 32  | 26 | Lauderers and dry-cleaners                                       | 154 19 |
| <b>2001</b>         | Upholsterers                                    | 7   | 54 | Lauderers and dry-cleaners                                       | 39 51  |
|                     | Weaving and knitting machine setters            | 2   | 15 | Tailors                                                          | 12 16  |
| <b>2010</b>         | Textile workers n.e.c.                          | 11  | 31 | Lauderers and dry-cleaners                                       | 47 39  |



|                   |                                  |     |    | Ilar et al. 2019                                                 |        |
|-------------------|----------------------------------|-----|----|------------------------------------------------------------------|--------|
|                   |                                  |     |    | Occupational exposure to organic dusts and risk of developing RA |        |
|                   | Launderers and dry-cleaners      | 8   | 23 | Tailors                                                          | 17 14  |
| <b>Flour dust</b> |                                  |     |    |                                                                  |        |
| <b>1960</b>       | Bakers and pastry cooks          | 178 | 96 | Bakers and pastry cooks                                          | 58 100 |
|                   | Grain mill and oil press workers | 8   | 4  | -                                                                | - -    |
| <b>1970</b>       | Bakers and pastry cooks          | 131 | 95 | Bakers and pastry cooks                                          | 76 97  |
|                   | Grain mill and oil press workers | 7   | 5  | Grain mill and oil press workers                                 | 2 3    |
| <b>1975</b>       | Bakers and pastry cooks          | 120 | 94 | Bakers and pastry cooks                                          | 73 97  |
|                   | Grain mill and oil press workers | 8   | 6  | Grain mill and oil press workers                                 | 2 3    |
| <b>1980</b>       | Bakers and pastry cooks          | 109 | 88 | Bakers and pastry cooks                                          | 96 93  |
|                   | Grain mill and oil press workers | 15  | 12 | Grain mill and oil press workers                                 | 7 7    |
| <b>1990</b>       | Bakers and pastry cooks          | 116 | 90 | Bakers and pastry cooks                                          | 126 98 |
|                   | Grain mill and oil press workers | 13  | 10 | Grain mill and oil press workers                                 | 3 2    |
| <b>2001</b>       | Bakers and pastry cooks          | 36  | 97 | Bakers and pastry cooks                                          | 27 100 |
|                   | Grain mill and oil press workers | 1   | 3  | -                                                                | - -    |
| <b>2010</b>       | Bakers and pastry cooks          | 45  | 96 | Bakers and pastry cooks                                          | 80 99  |
|                   | Grain mill and oil press workers | 2   | 4  | Grain mill and oil press workers                                 | 1 1    |

Abbreviations: NEC, Not Elsewhere Classified
